# Supplementary material for: Internet-Delivered Interpersonal Psychotherapy Versus Internet-Delivered Cognitive Behavioral Therapy for Adults With Depressive Symptoms: Randomized Controlled Noninferiority Trial
Source: J Med Internet Res. 2013 May 13;15(5):e82. doi: 10.2196/jmir.2307 (PMC3668608; doi:10.2196/jmir.2307)
Supplement: Supplementary file 3 [file jmir_v15i5e82_app3.pdf]

| Program                                                                 | Test time, n;mean (SD)   |                          |                          | Within-group effect size<br><i>d</i> (95% CI) |                            | Between-group effect size<br><i>d</i> (95% CI) |                                    |                                    |
|-------------------------------------------------------------------------|--------------------------|--------------------------|--------------------------|-----------------------------------------------|----------------------------|------------------------------------------------|------------------------------------|------------------------------------|
|                                                                         | Pretest                  | Posttest                 | Follow-up                | Pre- Post                                     | Pre-Follow-up <sup>a</sup> | Program                                        | Posttest                           | Follow-up                          |
| <b>Completers of posttest (n=478) and/or follow-up (n=245)</b>          |                          |                          |                          |                                               |                            |                                                |                                    |                                    |
| IPT                                                                     | 181;<br>38.57<br>(9.20)  | 181;<br>27.89<br>(12.42) | 93;<br>24.04<br>(14.39)  | 0.98<br>(0.76, 1.19)                          | 1.20<br>(0.88, 1.50)       | IPT vs Mood-GYM                                | 0.09<br>(-0.14,0.31) <sup>b</sup>  | 0.17<br>(0.15, 0.49) <sup>b</sup>  |
| CBT                                                                     | 160;<br>37.12<br>(9.00)  | 160;<br>25.51<br>(12.93) | 88;<br>19.50<br>(12.59)  | 1.04<br>(0.81, 1.27)                          | 1.60<br>(1.25, 1.93)       | CBT vs Mood-GYM                                | 0.10<br>(-0.32, 0.13) <sup>b</sup> | 0.14<br>(-0.18,0.47) <sup>c</sup>  |
| MoodGYM                                                                 | 137<br>39.06<br>(8.93)   | 137;<br>26.78<br>(13.53) | 64;<br>21.50<br>(15.45)  | 1.07<br>(0.82, 1.32)                          | 1.36<br>(0.97, 1.74)       |                                                |                                    |                                    |
| <b>Adherent completers of posttest (n=412) and/or follow-up (n=252)</b> |                          |                          |                          |                                               |                            |                                                |                                    |                                    |
| IPT                                                                     | 168;<br>38.60<br>(8.96)  | 168;<br>28.13<br>(12.72) | 102;<br>23.97<br>(13.78) | 0.95<br>(0.72,1.17)                           | 1.25<br>(0.95,1.55)        | IPT vs Mood-GYM                                | 0.14<br>(-0.11-0.38) <sup>b</sup>  | 0.24<br>(-0.08, 0.55) <sup>b</sup> |
| CBT                                                                     | 140;<br>36.83<br>(8.96)  | 140;<br>24.76<br>(12.71) | 89;<br>18.97<br>(13.78)  | 1.10<br>(0.84,1.35)                           | 1.54<br>(1.20,1.87)        | CBT vs Mood-GYM                                | 0.09<br>(-0.16-0.35) <sup>c</sup>  | 0.13<br>(-0.20, 0.45) <sup>c</sup> |
| MoodGYM                                                                 | 104;<br>38.76<br>(8.95)  | 104;<br>26.11<br>(17.15) | 61;<br>20.71<br>(13.77)  | 0.92<br>(0.64,1.21)                           | 1.49<br>(1.08,1.89)        |                                                |                                    |                                    |
| <b>ITT posttest and follow-up (N=1624)</b>                              |                          |                          |                          |                                               |                            |                                                |                                    |                                    |
| IPT                                                                     | 542;<br>38.57<br>(15.67) | 542;<br>27.89<br>(22.35) | 542;<br>24.54<br>(30.57) | 0.55<br>(0.43, 0.67)                          | 0.58<br>(0.46,0.70)        | IPT vs Mood-GYM                                | 0.05<br>(-0.07, 0.17) <sup>b</sup> | 0.08<br>(-0.04, 0.20) <sup>b</sup> |
| CBT                                                                     | 555;<br>37.12<br>(16.87) | 555;<br>25.51<br>(24.05) | 555;<br>20.35<br>(32.06) | 0.56<br>(0.44, 0.68)                          | 0.65<br>(0.53, 0.77)       | CBT vs Mood-GYM                                | 0.05<br>(-0.07,0.17) <sup>c</sup>  | 0.04<br>(-0.08, 0.16) <sup>c</sup> |
| MoodGYM                                                                 | 527;<br>39.06<br>(17.75) | 527;<br>26.78<br>(25.32) | 527;<br>21.74<br>(35.90) | 0.56<br>(0.44, 0.68)                          | 0.61<br>(0.49, 0.73)       |                                                |                                    |                                    |

<sup>a</sup>Within-group follow-up effect size for completers is based upon the following pre-test scores: IPT (n=93, mean 38.72, SD 9.66); CBT: ( n=88, mean 37.25, SD: 9.30); MoodGYM (n=64, mean 38.58, SD: 8.68). Within-group follow-up effect size for adherent completers is based upon the following pre-test scores: IPT (n=102, mean 38.69, SD: 9.29); CBT ( n=89, mean 37.12 , SD: 9.30); MoodGYM (n=61, mean 38.26, SD: 9.29).

<sup>b</sup> in favor of MoodGYM

<sup>c</sup> in favor of CBT.
